# Supplementary material for: Cadmium doping for improving the efficiency and stability of carbon-based CsPbIBr2 all-inorganic perovskite solar cells
Source: Royal Society of Chemistry journal article supplement (doi:10.1039/d0nj06317g), 2021-01-01
Supplement: d0nj06317g1.pdf [file d0nj06317g1.pdf]

## Electronic Supplementary Information (ESI)

### **Cadmium doping for improving the efficiency and stability of carbon-based CsPbIBr<sub>2</sub> all-inorganic perovskite solar cells**

Rufeng Wang<sup>a</sup>, Haiming Zhang<sup>a,\*</sup>, Siqi Han<sup>a</sup>, Yizhi Wu<sup>a</sup>, Zhanning Hu<sup>a</sup>, Guixiang Zhang<sup>a</sup>, Haoxuan Liu<sup>a</sup>,

Qingchen He<sup>a</sup>, Xianjing Zhang<sup>a</sup>

<sup>a</sup>School of Physical Science and Technology, Tiangong University, Tianjin 300387, PR China

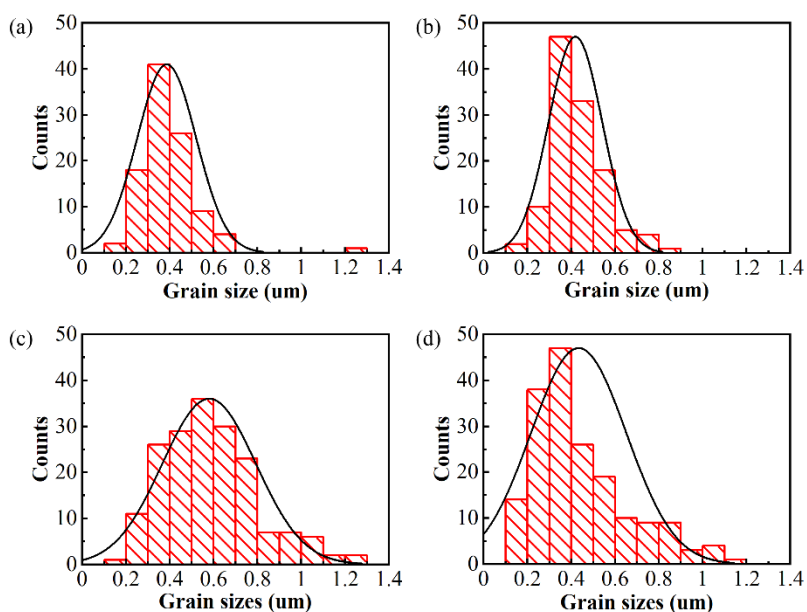

**Fig. S1.** Statistical chart of grain sizes corresponding to SEM images of the CsPbIBr<sub>2</sub> perovskite film with 0%-Cd, 0.25%-Cd, 0.5%-Cd and 1%-Cd, respectively.

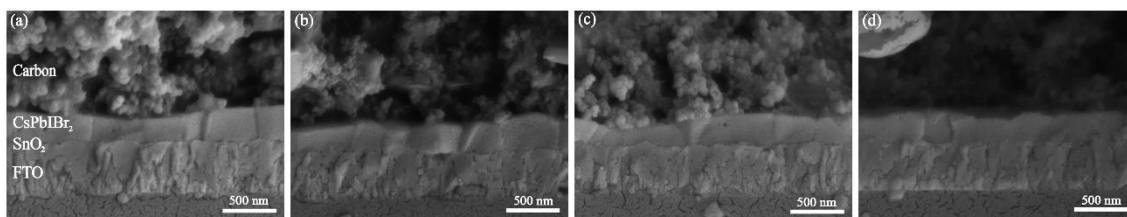

**Fig. S2.** The cross-sectional SEM images of the CsPbIBr<sub>2</sub> PSCs based on (a) 0%-Cd; (b) 0.25%-Cd; (c) 0.5%-Cd and (d) 1%-Cd.

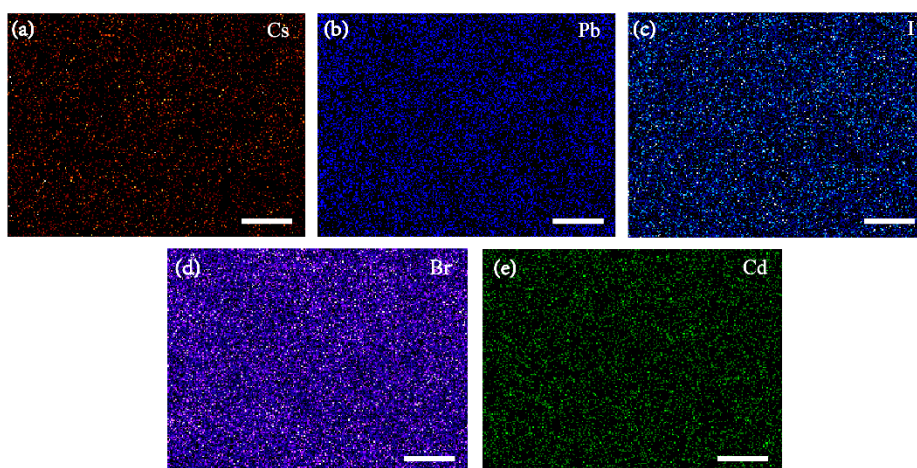

**Fig. S3.** Energy dispersive X-ray (EDX) mapping images of the CsPbIBr<sub>2</sub> film with 0.5%-Cd. The scale bar is 1 μm.

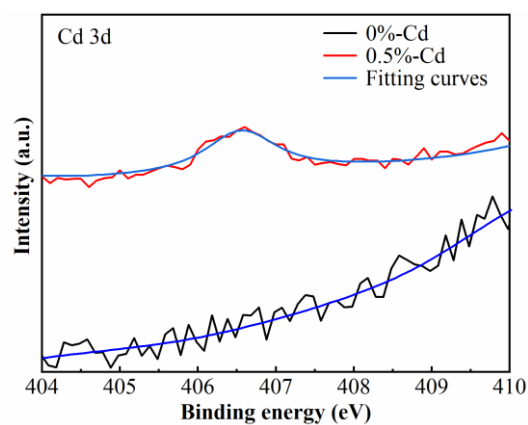

**Fig. S4.** XPS spectra of the CsPbIBr<sub>2</sub> film (0.5%-Cd) for Cd 3d.

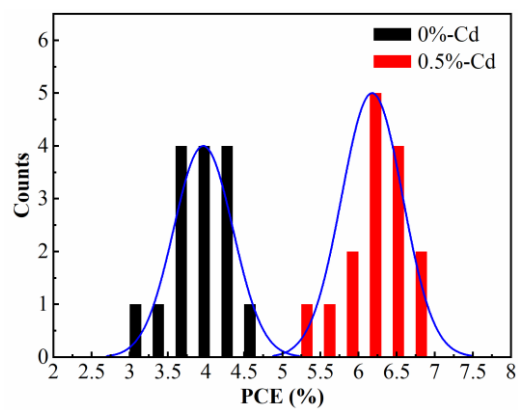

**Fig. S5** PCE distribution histograms of CsPbIBr<sub>2</sub> PSCs and CsPbIBr<sub>2</sub> PSCs with 0.5%-Cd (15 devices).

**Table S1.** TRPL fitting results of the CsPbIBr<sub>2</sub> films with x%-Cd (x=0, 0.25, 0.5, 1).

| samples  | A <sub>1</sub> | τ <sub>1</sub> (ns) | A <sub>2</sub> | τ <sub>2</sub> (ns) | τ <sub>avg</sub> (ns) |
|----------|----------------|---------------------|----------------|---------------------|-----------------------|
| 0%-Cd    | 0.96669        | 0.60398             | 0.11544        | 3.01125             | 1.50                  |
| 0.25%-Cd | 1.05582        | 0.59783             | 0.00983        | 12.66085            | 2.58                  |
| 0.5%-Cd  | 1.00580        | 0.5382              | 0.05315        | 11.33478            | 6.22                  |
| 1%-Cd    | 1.07784        | 0.64465             | 0.01074        | 8.58474             | 1.57                  |

**Table S2.** Band energies of CsPbIBr<sub>2</sub> films with x%-Cd determined by the UV-visible absorption spectra and UPS analysis.

| Samples  | E <sub>cutoff</sub> (eV) | E <sub>onset</sub> (eV) | VB maximum (eV) | Band gap (eV) | CB minimum (eV) |
|----------|--------------------------|-------------------------|-----------------|---------------|-----------------|
| 0%-Cd    | 16.90                    | 1.75                    | -6.07           | 2.05          | -4.02           |
| 0.25%-Cd | 16.91                    | 1.62                    | -5.93           | 2.05          | -3.88           |
| 0.5%-Cd  | 16.95                    | 1.47                    | -5.74           | 2.05          | -3.69           |
| 1%-Cd    | 16.92                    | 1.67                    | -5.96           | 2.05          | -3.91           |

**Table S3.** Summary of the photovoltaic performance parameters for CsPbIBr<sub>2</sub>-based PSCs via different provskite preparation techniques.

| Cell configuration <sup>a)</sup>                                                                                 | Perovskite fabrication method | V <sub>oc</sub> [V] | J <sub>sc</sub> [mA/cm <sup>2</sup> ] | FF    | PCE [%] | Ref              |
|------------------------------------------------------------------------------------------------------------------|-------------------------------|---------------------|---------------------------------------|-------|---------|------------------|
| FTO/SnO <sub>2</sub> /CsPbIBr <sub>2</sub> /Carbon                                                               | Cd <sup>2+</sup> doping       | 1.19                | 9.76                                  | 0.56  | 6.79    | <b>This work</b> |
| FTO/c-TiO <sub>2</sub> /CsPbIBr <sub>2</sub> /Au                                                                 | Dual-source evaporation       | 0.959               | 8.70                                  | 0.56  | 4.70    | 32               |
| FTO/c-TiO <sub>2</sub> /CsPbIBr <sub>2</sub> /Carbon                                                             | Precursor aging               | 1.142               | 9.11                                  | 0.63  | 6.55    | 21               |
| FTO/SnO <sub>2</sub> /CsPbIBr <sub>2</sub> /Carbon                                                               | Mn <sup>2+</sup> doping       | 0.99                | 13.15                                 | 0.57  | 7.36    | 30               |
| FTO/TiO <sub>2</sub> /CsPbIBr <sub>2</sub> /Carbon                                                               | Zn <sup>2+</sup> doping       | 1.26                | 10.87                                 | 0.66  | 9.04    | S1               |
| FTO/c-TiO <sub>2</sub> /CsPbIBr <sub>2</sub> /Carbon                                                             | Light processing              | 1.283               | 11.17                                 | 0.60  | 8.60    | S2               |
| FTO/c-TiO <sub>2</sub> /CsPbIBr <sub>2</sub> /Carbon                                                             | Intermolecular exchange       | 1.245               | 10.66                                 | 0.69  | 9.16    | 20               |
| FTO/c-TiO <sub>2</sub> /CsPbIBr <sub>2</sub> /CuPc/Carbon                                                        | Li <sup>+</sup> doping        | 1.213               | 10.27                                 | 0.74  | 9.25    | 28               |
| ITO/ZnO/CsPbIBr <sub>2</sub> /Spiro-OMeTAD/Ag                                                                    | One-step spin coating         | 1.04                | 8.78                                  | 0.525 | 4.8     | S3               |
| FTO/NiO <sub>x</sub> /CsPbIBr <sub>2</sub> /MoO <sub>x</sub> /Au                                                 | One-step spin coating         | 0.85                | 10.56                                 | 0.62  | 5.52    | 18               |
| ITO/In <sub>2</sub> S <sub>3</sub> /CsPbIBr <sub>2</sub> /Spiro-OMeTAD/Au                                        | Two-step annealing            | 1.090               | 7.76                                  | 0.66  | 5.59    | 23               |
| FTO/TiO <sub>2</sub> /CsPbIBr <sub>2</sub> /Spiro-OMeTAD/Ag                                                      | Cu <sup>2+</sup> doping       | 1.20                | 11.90                                 | 0.649 | 9.32    | 45               |
| FTO/TiO <sub>2</sub> /CsPbIBr <sub>2</sub> /PCBM/Au                                                              | Ba <sup>2+</sup> doping       | 1.19                | 11.91                                 | 0.74  | 10.51   | 31               |
| FTO/SnO <sub>2</sub> /C <sub>60</sub> /CsPb <sub>0.75</sub> Sn <sub>0.25</sub> IBr <sub>2</sub> /Spiro-OMeTAD/Au | Sn <sup>2+</sup> doping       | 1.21                | 12.57                                 | 0.758 | 11.53   | 29               |

a) spiro-OMeTAD = 2,2',7,7'-tetrakis-(N,N-di-4-methoxyphenylamino)-9,9'-spirobifluorene.

#### References:

- S1. Y. Guo, F. Zhao, Z. Li, J. Tao, D. Zheng, J. Jiang and J. Chu, *Organic Electronics*, 2020, **83**, 105731.  
 S2. Q. Zhang, W. Zhu, D. Chen, Z. Zhang, Z. Lin, J. Chang, J. Zhang, C. Zhang and Y. Hao, *ACS Applied Materials & Interfaces*,

2019, **11**, 2997-3005.

- S3. M. Aamir, T. Adhikari, M. Sher, N. Revaprasadu, W. Khalid, J. Akhtar and J.-M. Nunzi, *New Journal of Chemistry*, 2018, **42**, 14104-14110.
